# Supplementary material for: Health Evaluation and Referral Assistant: A Randomized Controlled Trial of a Web-Based Screening, Brief Intervention, and Referral to Treatment System to Reduce Risky Alcohol Use Among Emergency Department Patients
Source: PubMed Central journal article supplement (PMC5432666; doi:10.2196/jmir.6812), 2017-05-01

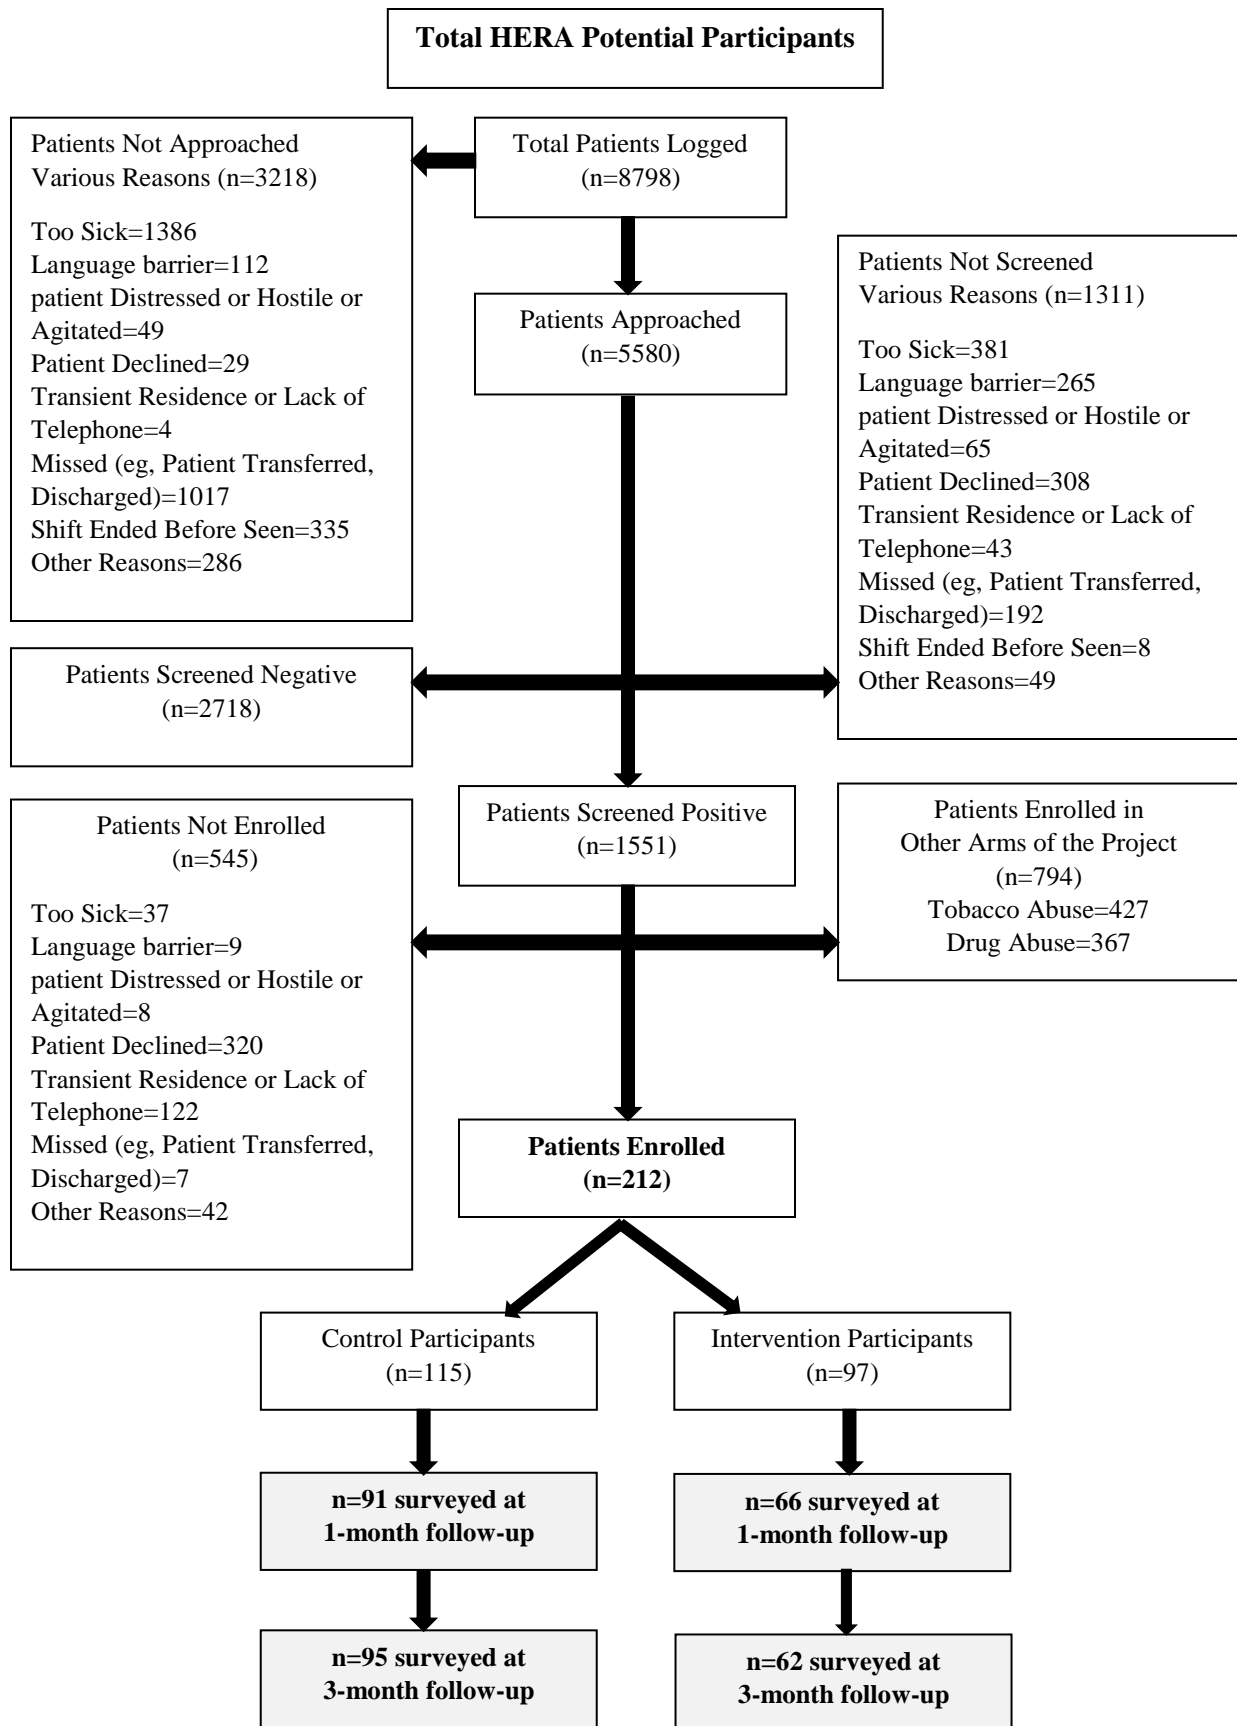

Supplement: jmir_v19i5e119_app3.pdf [file jmir_v19i5e119_app3.pdf]
